# Supplementary material for: DTX3L and ARTD9 inhibit IRF1 expression and mediate in cooperation with ARTD8 survival and proliferation of metastatic prostate cancer cells
Source: PubMed Central journal article supplement (PMC4070648; doi:10.1186/1476-4598-13-125), 2014-05-27

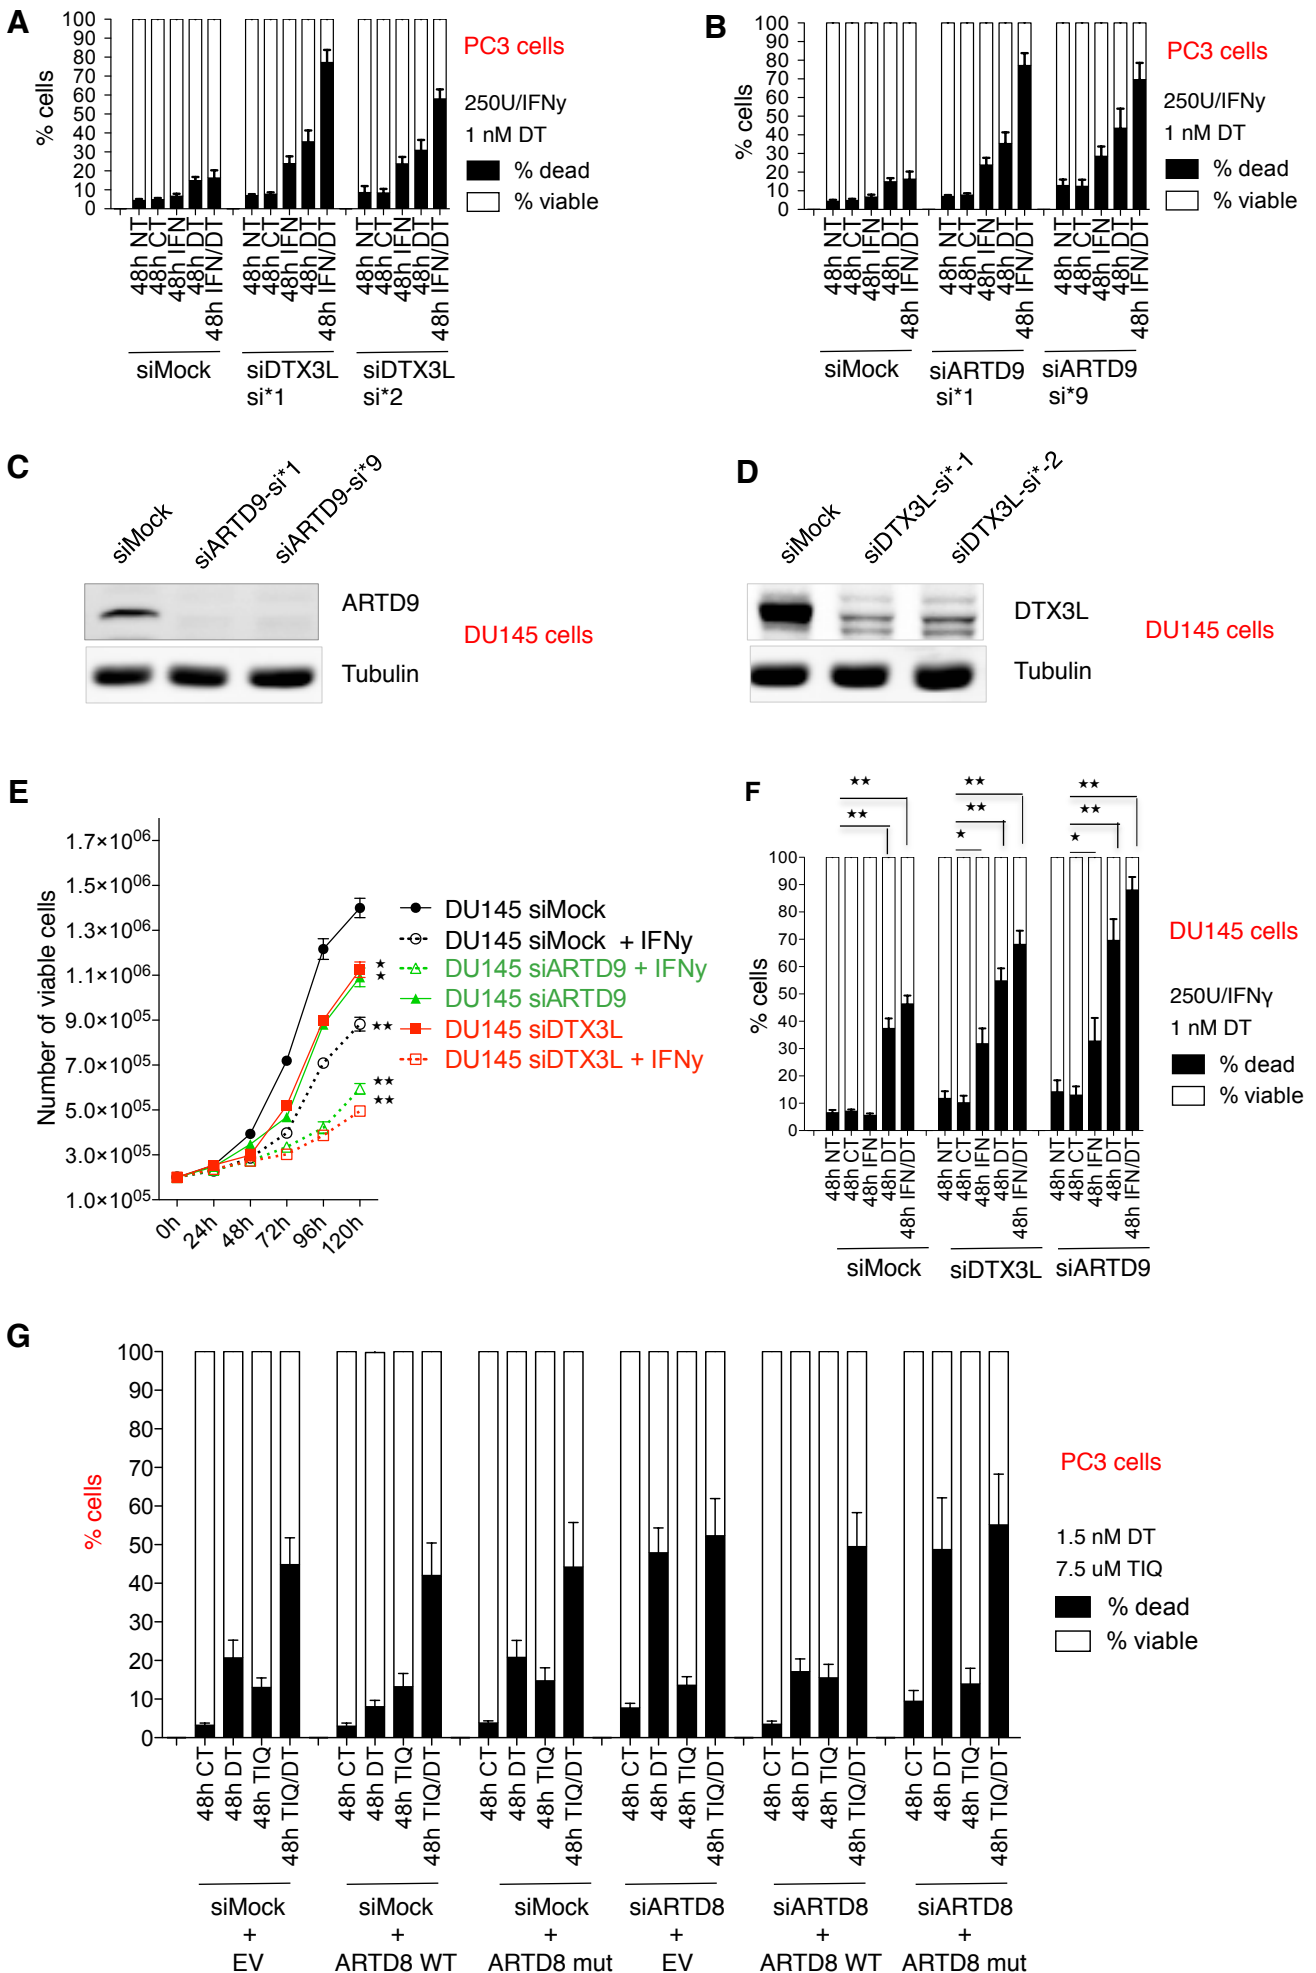

Supplement: 1476-4598-13-125-S6.pdf [file 1476-4598-13-125-S6.pdf]
